# Supplementary material for: Dendritic cells efficiently transmit HIV to T Cells in a tenofovir and raltegravir insensitive manner
Source: PubMed Central journal article supplement (PMC5749731; doi:10.1371/journal.pone.0189945), 2018-01-02
Supplement: pone.0189945.s002.pdf [file pone.0189945.s002.pdf]

**S1 Table. HIV-1 molecular clones.**

| Molecular clone | Tropism | Catalog No. | Source               |
|-----------------|---------|-------------|----------------------|
| pNL4-3          | CXCR4   | 114         | AIDS Reagent Program |
| pLAI.2          | CXCR4   | 2532        | AIDS Reagent Program |
| pWT/BaL         | CCR5    | 11414       | AIDS Reagent Program |
| pYK-JRCSF       | CCR5    | 2708        | AIDS Reagent Program |
| NFN-SX          | CCR5    |             | (50)                 |
| p89.6           | dual    | 3552        | AIDS Reagent Program |
| pWITO.c/2474    | CCR5    | 11739       | AIDS Reagent Program |
| pCH040.c/2625   | CCR5    | 11740       | AIDS Reagent Program |
| pCH077.t/2627   | CCR5    | 11742       | AIDS Reagent Program |
| pCH106.c/2633   | CCR5    | 11743       | AIDS Reagent Program |
| pTHRO.c/2626    | CCR5    | 11745       | AIDS Reagent Program |
| pREJO.c/2864    | CCR5    | 11746       | AIDS Reagent Program |
| pCH058.c/2960   | CCR5    | 11856       | AIDS Reagent Program |
